# Supplementary material
Source: Springer Nature journal article supplement (http://www.nature.com/nbt/journal/v25/n4/extref/nbt0407-390-S1.pdf)
Supplement: nbt0407-390-S1.pdf [file nbt0407-390-S1.pdf]

# Standards in Computational Systems Biology

## *Supplementary Material:*

### *Statements About Specific Computational Tools*

Edda Klipp<sup>1</sup>, Wolfram Liebermeister<sup>1</sup>, Anselm Helbig<sup>1</sup>, Axel Kowald<sup>1,2</sup>, Jörg Schaber<sup>1</sup>

<sup>1</sup>Max Planck Institute for Molecular Genetics, Berlin, Germany

<sup>2</sup>Ruhr University Bochum, Bochum, Germany

The following table contains the complete list of the 105 software tools that were considered in the questionnaire plus 24 additional software tools that were mentioned by the respondents. These additional tools are marked with an asterisk behind the name. The table also contains all the comments that were given for the different tools. We did not edit the comments in any way (except for spelling), as to provide the reader with an unbiased overview of the results of the questionnaire.

| Tool                | URL                                                                                                                                                | Comments                                                                                                                 |
|---------------------|----------------------------------------------------------------------------------------------------------------------------------------------------|--------------------------------------------------------------------------------------------------------------------------|
| 13C Flux*           | <a href="http://www.simtec.mb.uni-siegen.de/software_13cflux.0.html">www.simtec.mb.uni-siegen.de/software_13cflux.0.html</a>                       |                                                                                                                          |
| BALSA               | dead link                                                                                                                                          |                                                                                                                          |
| BASIS               | <a href="http://www.basis.ncl.ac.uk">www.basis.ncl.ac.uk</a>                                                                                       | Carry out simulations remotely, store models and results, easy to get data for export, easy to make changes to models.   |
| Berkeley Madonna*   | <a href="http://www.berkeleymadonna.com">www.berkeleymadonna.com</a>                                                                               | Berkeley Madonna is arguably the fastest, most convenient, general purpose differential equation solver available today. |
| BIOCHAM             | contraintes.inria.fr/BIOCHAM                                                                                                                       |                                                                                                                          |
| BioCharon           | <a href="http://www.cis.upenn.edu/biocomp/new.html">www.cis.upenn.edu/biocomp/new.html</a>                                                         |                                                                                                                          |
| biocyc2SBML         | genome.dfci.harvard.edu/~zucker/BPHYS/biocyc-open                                                                                                  |                                                                                                                          |
| BioGrid             | biocomp.ece.utk.edu/tools.html                                                                                                                     |                                                                                                                          |
| BioModels           | <a href="http://www.biomodels.net">www.biomodels.net</a>                                                                                           | Curated database.                                                                                                        |
| ByoDyn*             | arva.imim.es/ByoDyn                                                                                                                                |                                                                                                                          |
| BioNetGen           | cellsignaling.lanl.gov/bionetgen                                                                                                                   |                                                                                                                          |
| BioPathway Explorer | limsfinder.com/BlogDetail.aspx?id=982_0_3_0_C38                                                                                                    |                                                                                                                          |
| Bio Sketch Pad      | <a href="http://www.cis.upenn.edu/biocomp/new.html/biosketch.php3">www.cis.upenn.edu/biocomp/new.html/biosketch.php3</a>                           |                                                                                                                          |
| BioSens             | <a href="http://www.chemengr.ucsb.edu/~ceweb/faculty/doyle/biosens/BioSens.htm">www.chemengr.ucsb.edu/~ceweb/faculty/doyle/biosens/BioSens.htm</a> |                                                                                                                          |
| BioSPICE Dashboard  | biospice.org                                                                                                                                       |                                                                                                                          |
| BioSpreadsheet      | biocomp.ece.utk.edu/tools.html                                                                                                                     |                                                                                                                          |
| BioTapestry         | labs.systemsbiochemistry.net/bolouri/software/BioTapestry/                                                                                         |                                                                                                                          |

|              |                                                                                                                                        |                                                                                                                                                                                                                                                                                                                                                                                                                                                                                                                                                                                                                                                                                                                                                                                                                                               |
|--------------|----------------------------------------------------------------------------------------------------------------------------------------|-----------------------------------------------------------------------------------------------------------------------------------------------------------------------------------------------------------------------------------------------------------------------------------------------------------------------------------------------------------------------------------------------------------------------------------------------------------------------------------------------------------------------------------------------------------------------------------------------------------------------------------------------------------------------------------------------------------------------------------------------------------------------------------------------------------------------------------------------|
| BioUML       | <a href="http://www.biouml.org">www.biouml.org</a>                                                                                     |                                                                                                                                                                                                                                                                                                                                                                                                                                                                                                                                                                                                                                                                                                                                                                                                                                               |
| BSTLab       | <a href="http://bioinformatics.musc.edu/bstlab">bioinformatics.musc.edu/bstlab</a>                                                     |                                                                                                                                                                                                                                                                                                                                                                                                                                                                                                                                                                                                                                                                                                                                                                                                                                               |
| C/C++        |                                                                                                                                        | <p>C and C++ are popular programming languages, which you can use on any platform and obviate the use of customized modeling software. The executable code generated runs quickly.</p> <p>Easily available, free download (gcc), speed of computation, good flexibility, good portability with appropriate programming techniques and libraries (Qt), good and flexible representation of results with appropriate libraries.</p> <p>Building applications based on SBML ODE Solver and libSBML.</p> <p>Geometric calculations.</p> <p>Only for certain computation time intensive programs.</p> <p>Flexible, ideal for purpose.</p>                                                                                                                                                                                                          |
| CADLIVE      | <a href="http://kurata21.bse.kyutech.ac.jp/cadlive">kurata21.bse.kyutech.ac.jp/cadlive</a>                                             |                                                                                                                                                                                                                                                                                                                                                                                                                                                                                                                                                                                                                                                                                                                                                                                                                                               |
| CellDesigner | <a href="http://celldesigner.org">celldesigner.org</a>                                                                                 | <p>Graphical representation of the network.</p> <p>Communication / model exchange with other tools.</p> <p>CellDesigner is great for diagramming reaction networks enabling us to document our models and develop model proposals and 'sell' our model. We have had some problems simulating complex models with CellDesigner.</p> <p>CellDesigner is great for graphical modeling. However, for mathematical modeling it is almost unusable. To many clicks to complex editing of a models mathematics.</p> <p>I like the GUI for cell designer.</p> <p>Easy to use.</p> <p>Diagramming biochemical reaction networks.</p> <p>My favorite one for graphical representation.</p> <p>Availability, good Graphical representation, SBML.</p> <p>Used mostly for graphical presentation, however it doesn't label the reaction on the graph.</p> |
| Cellerator   | <a href="http://www-aig.jpl.nasa.gov/public/mls/cellerator">www-aig.jpl.nasa.gov/public/mls/cellerator</a>                             |                                                                                                                                                                                                                                                                                                                                                                                                                                                                                                                                                                                                                                                                                                                                                                                                                                               |
| CellML2SBML  | <a href="http://sbml.org/software/cellml2sbml">sbml.org/software/cellml2sbml</a>                                                       |                                                                                                                                                                                                                                                                                                                                                                                                                                                                                                                                                                                                                                                                                                                                                                                                                                               |
| Cellware     | <a href="http://www.bii.a-star.edu.sg/achievements/applications/cellware">www.bii.a-star.edu.sg/achievements/applications/cellware</a> |                                                                                                                                                                                                                                                                                                                                                                                                                                                                                                                                                                                                                                                                                                                                                                                                                                               |
| CL-SBML      | <a href="http://common-lisp.net/project/cl-sbml">common-lisp.net/project/cl-sbml</a>                                                   |                                                                                                                                                                                                                                                                                                                                                                                                                                                                                                                                                                                                                                                                                                                                                                                                                                               |

|                                 |                                                                                                                      |                                                                                                                                                                                                                                                                                                                 |
|---------------------------------|----------------------------------------------------------------------------------------------------------------------|-----------------------------------------------------------------------------------------------------------------------------------------------------------------------------------------------------------------------------------------------------------------------------------------------------------------|
| CLEML*                          | <a href="http://sg.ustc.edu.cn/MFA/cleml">sg.ustc.edu.cn/MFA/cleml</a>                                               |                                                                                                                                                                                                                                                                                                                 |
| COPASI                          | <a href="http://www.copasi.org/tiki-index.php">www.copasi.org/tiki-index.php</a>                                     | Copasi is the favorite tool in our group since the developers maintain a very close contact to a wide range of users and thereby we hope that the further development of Copasi will be substantial and actually happen.<br><br>Easy to use, latest version had some problems with simulation time in formulas. |
| Cytoscape                       | <a href="http://www.cytoscape.org">www.cytoscape.org</a>                                                             | Interaction network visualization, GO annotation.                                                                                                                                                                                                                                                               |
| Dbsolve                         | <a href="http://biosim.genebee.msu.su/en">biosim.genebee.msu.su/en</a>                                               | The most powerful and useful tool for biological kinetic modeling and developing of ODE models. Very good combination of model design, calculating and representation modules.                                                                                                                                  |
| Dizzy                           | <a href="http://magnet.systemsbiology.net/software/Dizzy">magnet.systemsbiology.net/software/Dizzy</a>               | I've used Dizzy in a classroom setting. It is good for teaching, but it has some limitations making it difficult to use in general. It is not very efficient and only supports SBML level 1. It does have a nice mix of analyzers though.                                                                       |
| E-CELL                          | <a href="http://www.e-cell.org/software/e-cell-system">www.e-cell.org/software/e-cell-system</a>                     |                                                                                                                                                                                                                                                                                                                 |
| ecellJ                          | <a href="http://www.jweimar.de/ecellJ">www.jweimar.de/ecellJ</a>                                                     |                                                                                                                                                                                                                                                                                                                 |
| ESS                             | <a href="http://biocomp.ece.utk.edu">biocomp.ece.utk.edu</a>                                                         | ESS is a pretty efficient stochastic simulator. It is, however, limited in the types of kinetic laws that it can support.                                                                                                                                                                                       |
| Excel                           | <a href="http://www.microsoft.com">www.microsoft.com</a>                                                             | Microsoft Excel is widely used and very easy to use for simple data management.<br><br>Used only for simple calculations.<br><br>Useful in spreadsheet calculation and graphics.<br><br>Only for user-friendly software development.                                                                            |
| FluxAnalyzer                    | <a href="http://www.mpi-magdeburg.mpg.de/projects/flux-analyzer">www.mpi-magdeburg.mpg.de/projects/flux-analyzer</a> |                                                                                                                                                                                                                                                                                                                 |
| Fluxor                          | <a href="http://arep.med.harvard.edu/moma/FluxorPipeline.tar.gz">arep.med.harvard.edu/moma/FluxorPipeline.tar.gz</a> |                                                                                                                                                                                                                                                                                                                 |
| Genetic Network Analyser (GNA)* | <a href="http://www-helix.inrialpes.fr/article122.html">www-helix.inrialpes.fr/article122.html</a>                   |                                                                                                                                                                                                                                                                                                                 |
| Gepasi                          | <a href="http://www.gepasi.org">www.gepasi.org</a>                                                                   |                                                                                                                                                                                                                                                                                                                 |
| Gillespie2*                     | <a href="http://www.basis.ncl.ac.uk/software.html">www.basis.ncl.ac.uk/software.html</a>                             |                                                                                                                                                                                                                                                                                                                 |
| GRIND*                          | <a href="http://theory.bio.uu.nl/rdb/grind.html">theory.bio.uu.nl/rdb/grind.html</a>                                 |                                                                                                                                                                                                                                                                                                                 |
| INA*                            | <a href="http://www2.informatik.hu-berlin.de/~starke/ina.html">www2.informatik.hu-berlin.de/~starke/ina.html</a>     | INA is a tool package supporting the analysis of Place/Transition Nets (Petri Nets) and Colored Petri nets.                                                                                                                                                                                                     |
| INSILICO discovery              | <a href="http://www.insilico-biotechnology.com">www.insilico-biotechnology.com</a>                                   |                                                                                                                                                                                                                                                                                                                 |
| JACOBIAN                        | <a href="http://numericatech.com/jacobian.htm">numericatech.com/jacobian.htm</a>                                     |                                                                                                                                                                                                                                                                                                                 |
| Jarnac                          | <a href="http://www.sys-bio.org">www.sys-bio.org</a>                                                                 | Jarnac is free and is a good model development environment but it is significantly slower than both Matlab and SBML ODE Solver.                                                                                                                                                                                 |
| JAVA                            | <a href="http://www.java.com">www.java.com</a>                                                                       | Is freely distributed, provides a lot of well established functionality.<br><br>All purpose.                                                                                                                                                                                                                    |
| JavaEvA*                        | <a href="http://www-ra.informatik.uni-">www-ra.informatik.uni-</a>                                                   |                                                                                                                                                                                                                                                                                                                 |

|             |                                                                                                                                                                    |                                                                                                                                                                                                                                                                                                                                                                                                                                                                                                                                                                                                                                                                                                                                                                                                                                                                                                                                                                                                                                      |
|-------------|--------------------------------------------------------------------------------------------------------------------------------------------------------------------|--------------------------------------------------------------------------------------------------------------------------------------------------------------------------------------------------------------------------------------------------------------------------------------------------------------------------------------------------------------------------------------------------------------------------------------------------------------------------------------------------------------------------------------------------------------------------------------------------------------------------------------------------------------------------------------------------------------------------------------------------------------------------------------------------------------------------------------------------------------------------------------------------------------------------------------------------------------------------------------------------------------------------------------|
|             | <a href="http://tuebingen.de/software/JavaEvA">tuebingen.de/software/JavaEvA</a>                                                                                   |                                                                                                                                                                                                                                                                                                                                                                                                                                                                                                                                                                                                                                                                                                                                                                                                                                                                                                                                                                                                                                      |
| JCell*      | <a href="http://www-ra.informatik.uni-tuebingen.de/software/JCell">www-ra.informatik.uni-tuebingen.de/software/JCell</a>                                           |                                                                                                                                                                                                                                                                                                                                                                                                                                                                                                                                                                                                                                                                                                                                                                                                                                                                                                                                                                                                                                      |
| JDesigner   | <a href="http://www.sys-bio.org">www.sys-bio.org</a>                                                                                                               |                                                                                                                                                                                                                                                                                                                                                                                                                                                                                                                                                                                                                                                                                                                                                                                                                                                                                                                                                                                                                                      |
| JigCell     | <a href="http://jigcell.biol.vt.edu">jigcell.biol.vt.edu</a>                                                                                                       |                                                                                                                                                                                                                                                                                                                                                                                                                                                                                                                                                                                                                                                                                                                                                                                                                                                                                                                                                                                                                                      |
| JSim*       | <a href="http://nsr.bioeng.washington.edu/PLN/Members/butterw/JSIMDOC1.6/JSim_Home.stx">nsr.bioeng.washington.edu/PLN/Members/butterw/JSIMDOC1.6/JSim_Home.stx</a> |                                                                                                                                                                                                                                                                                                                                                                                                                                                                                                                                                                                                                                                                                                                                                                                                                                                                                                                                                                                                                                      |
| JWS Online  | <a href="http://jjj.biochem.sun.ac.za">jjj.biochem.sun.ac.za</a>                                                                                                   |                                                                                                                                                                                                                                                                                                                                                                                                                                                                                                                                                                                                                                                                                                                                                                                                                                                                                                                                                                                                                                      |
| Karyote     | <a href="http://biodynamics.indiana.edu/CellModeling">biodynamics.indiana.edu/CellModeling</a>                                                                     |                                                                                                                                                                                                                                                                                                                                                                                                                                                                                                                                                                                                                                                                                                                                                                                                                                                                                                                                                                                                                                      |
| KEGG2SBML   | <a href="http://www.sbml.org/kegg2sbml.html">www.sbml.org/kegg2sbml.html</a>                                                                                       |                                                                                                                                                                                                                                                                                                                                                                                                                                                                                                                                                                                                                                                                                                                                                                                                                                                                                                                                                                                                                                      |
| Kinsolver   | <a href="http://lsdis.cs.uga.edu/~aleman/kinsolver">lsdis.cs.uga.edu/~aleman/kinsolver</a>                                                                         |                                                                                                                                                                                                                                                                                                                                                                                                                                                                                                                                                                                                                                                                                                                                                                                                                                                                                                                                                                                                                                      |
| libSBML     | <a href="http://www.sbml.org/software/libsbml">www.sbml.org/software/libsbml</a>                                                                                   | Building applications using C++.                                                                                                                                                                                                                                                                                                                                                                                                                                                                                                                                                                                                                                                                                                                                                                                                                                                                                                                                                                                                     |
| Mathcad*    | <a href="http://www.mathcad.com">www.mathcad.com</a>                                                                                                               |                                                                                                                                                                                                                                                                                                                                                                                                                                                                                                                                                                                                                                                                                                                                                                                                                                                                                                                                                                                                                                      |
| Mathematica | <a href="http://www.wolframresearch.com">www.wolframresearch.com</a>                                                                                               | <p>Mathematica is a general programming language and thus has in principle no limitations. It combines analytical, numerical and graphical task in a very elegant way.</p> <p>I prefer Mathematica as I can work both in symbolic and numerical analysis. This is important if you want to analyze design principles in metabolism and focus on classes of systems. The disadvantage is that the learning curve with Mathematica is not easy. It takes time and effort.</p> <p>Ease of inputting graph or equations, good representation of results, relatively good speed of computation.</p> <p>Hypothesis testing.</p> <p>Used for model building and testing.</p>                                                                                                                                                                                                                                                                                                                                                                |
| MatLab      | <a href="http://www.mathworks.com">www.mathworks.com</a>                                                                                                           | <p>Since it takes so much time to get up to speed with any software, the by far most important criterion is the flexibility to be able to do most things I/we need and simplicity. For the former reason mainly, MatLab is our tool of choice.</p> <p>Matlab provides the possibility to write own programs/tools (-&gt; method development!). It is easy to link other tools (Excel, solvers...) and to access data. Visualization of networks is not satisfying as is the visual presentation of the results. I also prefer to use an external solver for optimizations problems.</p> <p>You can use it for any kind of modeling. Except graphical interpretations/gui are not so user friendly and time-consuming.</p> <p>Presence and quality of analysis tools.</p> <p>Matlab is flexible and has a good optimization package.</p> <p>MATLAB is in my opinion the best tool when it comes to flexibility. A wide range of inbuilt functionality together with a powerful scripting environment make it perfectly suited for</p> |

|          |                                                                            |                                                                                                                                                                                                                                                                                                                                                                                                                                                                                                                                                                                                                                                                                                                                                                                                                                                                                                                                                                                                                                                                                                                                                                                                                                                                                                                                                                                                                                                                                                                                                                                                                                                                                                                                                                                                                                                                                                                                                                                                                                                                                                                                                                                                                                                                                                                               |
|----------|----------------------------------------------------------------------------|-------------------------------------------------------------------------------------------------------------------------------------------------------------------------------------------------------------------------------------------------------------------------------------------------------------------------------------------------------------------------------------------------------------------------------------------------------------------------------------------------------------------------------------------------------------------------------------------------------------------------------------------------------------------------------------------------------------------------------------------------------------------------------------------------------------------------------------------------------------------------------------------------------------------------------------------------------------------------------------------------------------------------------------------------------------------------------------------------------------------------------------------------------------------------------------------------------------------------------------------------------------------------------------------------------------------------------------------------------------------------------------------------------------------------------------------------------------------------------------------------------------------------------------------------------------------------------------------------------------------------------------------------------------------------------------------------------------------------------------------------------------------------------------------------------------------------------------------------------------------------------------------------------------------------------------------------------------------------------------------------------------------------------------------------------------------------------------------------------------------------------------------------------------------------------------------------------------------------------------------------------------------------------------------------------------------------------|
|          |                                                                            | <p>research in systems biology. (static, deterministic, lumped models). The SBToolbox is a very useful MATLAB based platform that provides absolutely needed functionality in terms of model handling, models analysis, etc., that is not available in the standard MATLAB distribution. The user still has all flexibility to perform the desired tasks. Performance issues with MATLAB and SBtoolbox exist. MATLABs simulators are SLOW. However, using the SBaddon package, that interfaces nicely with the SBtoolbox, this issue can be resolved, leading to high performance simulations. (<a href="http://www.sbtoolbox.org/SBaddon">www.sbtoolbox.org/SBaddon</a>).</p> <p>It is nice for graphical representation, but most researchers in the developing world cannot afford the full version.</p> <p>MATLAB has the toolboxes; this is essential.</p> <p>Matlab allows for fast prototyping and is very flexible.</p> <p>Matlab has good graphical representation and can handle large data sets.</p> <p>MATLAB is a all-purpose (computing language, interactive environment for algorithm development, data visualization, data analysis, and numeric computation). - very good help and great error-locator - convenient and powerful 2-D and 3-D graphics functions for visualizing data. - easy access on already implemented mathematical functions for linear algebra, statistics, Fourier analysis, filtering, optimization, and numerical integration - Functions for integrating MATLAB based algorithms with external applications and languages ( e.g. C, C++, Fortran, Java, COM, and Excel ) disadvantages: very expensive, very memory intensive.</p> <p>Provides a huge functionality to solve ordinary differential equations numerical and also a easy programming language as well as technical support.</p> <p>Gives many flexibility for analysis, fast, numbers of available toolbox, results/graphs can be exported in various formats.</p> <p>Parameter optimization, modeling.</p> <p>Only rarely for simulation, mainly for data/simulation output analysis.</p> <p>Hypothesis testing.</p> <p>My students use and love it.</p> <p>Standard for the Industry, high performance and flexibility, availability at universities.</p> <p>Enables fast development and good visualization.</p> |
| MathSBML | <a href="http://sbml.org/software/mathsbml">sbml.org/software/mathsbml</a> |                                                                                                                                                                                                                                                                                                                                                                                                                                                                                                                                                                                                                                                                                                                                                                                                                                                                                                                                                                                                                                                                                                                                                                                                                                                                                                                                                                                                                                                                                                                                                                                                                                                                                                                                                                                                                                                                                                                                                                                                                                                                                                                                                                                                                                                                                                                               |

|                 |                                                                                                                                                                                                     |                                                                                                                                                                                                                                                                                                                                                                                                                                                                                                                                                                                                                                                                                                                                                                                                                                                                                                                                                                                                                                                                                                                                                                                                                                                                                                                                                                                                                             |
|-----------------|-----------------------------------------------------------------------------------------------------------------------------------------------------------------------------------------------------|-----------------------------------------------------------------------------------------------------------------------------------------------------------------------------------------------------------------------------------------------------------------------------------------------------------------------------------------------------------------------------------------------------------------------------------------------------------------------------------------------------------------------------------------------------------------------------------------------------------------------------------------------------------------------------------------------------------------------------------------------------------------------------------------------------------------------------------------------------------------------------------------------------------------------------------------------------------------------------------------------------------------------------------------------------------------------------------------------------------------------------------------------------------------------------------------------------------------------------------------------------------------------------------------------------------------------------------------------------------------------------------------------------------------------------|
| MesoRD          | mesord.sourceforge.net                                                                                                                                                                              | Meso RD is freely available, very fast, and it is easy to do stochastic and deterministic reaction diffusion simulations of new systems using SBML input.<br><br>Efficiency, ease of testing new systems, availability.                                                                                                                                                                                                                                                                                                                                                                                                                                                                                                                                                                                                                                                                                                                                                                                                                                                                                                                                                                                                                                                                                                                                                                                                     |
| MetaboLogica    | www.MetaboLogica.com                                                                                                                                                                                |                                                                                                                                                                                                                                                                                                                                                                                                                                                                                                                                                                                                                                                                                                                                                                                                                                                                                                                                                                                                                                                                                                                                                                                                                                                                                                                                                                                                                             |
| MetaFluxNet     | mbel.kaist.ac.kr/mfn                                                                                                                                                                                |                                                                                                                                                                                                                                                                                                                                                                                                                                                                                                                                                                                                                                                                                                                                                                                                                                                                                                                                                                                                                                                                                                                                                                                                                                                                                                                                                                                                                             |
| MMT2            | www.simtec.mb.uni-siegen.de/software_mmt2.0.html                                                                                                                                                    |                                                                                                                                                                                                                                                                                                                                                                                                                                                                                                                                                                                                                                                                                                                                                                                                                                                                                                                                                                                                                                                                                                                                                                                                                                                                                                                                                                                                                             |
| Modesto         | bioinformatics.oxfordjournals.org/cgi/content/abstract/20/3/316?maxtoshow=&HITS=10&hits=10&RESULTFORMAT=&fulltext=kiehl&searchid=1130434154165_1865&stored_search=&FIRSTINDEX=0&journalcode=bioinfo |                                                                                                                                                                                                                                                                                                                                                                                                                                                                                                                                                                                                                                                                                                                                                                                                                                                                                                                                                                                                                                                                                                                                                                                                                                                                                                                                                                                                                             |
| Moleculizer     | www.molsci.org/~lok/moleculizer                                                                                                                                                                     |                                                                                                                                                                                                                                                                                                                                                                                                                                                                                                                                                                                                                                                                                                                                                                                                                                                                                                                                                                                                                                                                                                                                                                                                                                                                                                                                                                                                                             |
| Monod           | monod.molsci.org                                                                                                                                                                                    |                                                                                                                                                                                                                                                                                                                                                                                                                                                                                                                                                                                                                                                                                                                                                                                                                                                                                                                                                                                                                                                                                                                                                                                                                                                                                                                                                                                                                             |
| Narrator        | narrator-tool.org                                                                                                                                                                                   |                                                                                                                                                                                                                                                                                                                                                                                                                                                                                                                                                                                                                                                                                                                                                                                                                                                                                                                                                                                                                                                                                                                                                                                                                                                                                                                                                                                                                             |
| NetBuilder      | strc.herts.ac.uk/bio/maria/NetBuilder                                                                                                                                                               |                                                                                                                                                                                                                                                                                                                                                                                                                                                                                                                                                                                                                                                                                                                                                                                                                                                                                                                                                                                                                                                                                                                                                                                                                                                                                                                                                                                                                             |
| Octave*         | <a href="http://www.octave.org">www.octave.org</a>                                                                                                                                                  | Matlab clone                                                                                                                                                                                                                                                                                                                                                                                                                                                                                                                                                                                                                                                                                                                                                                                                                                                                                                                                                                                                                                                                                                                                                                                                                                                                                                                                                                                                                |
| Oscill8         | oscill8.sourceforge.net                                                                                                                                                                             |                                                                                                                                                                                                                                                                                                                                                                                                                                                                                                                                                                                                                                                                                                                                                                                                                                                                                                                                                                                                                                                                                                                                                                                                                                                                                                                                                                                                                             |
| Pajek*          | vlado.fmf.uni-lj.si/pub/networks/pajek                                                                                                                                                              | Program for Large Network Analysis.                                                                                                                                                                                                                                                                                                                                                                                                                                                                                                                                                                                                                                                                                                                                                                                                                                                                                                                                                                                                                                                                                                                                                                                                                                                                                                                                                                                         |
| PANTHER Pathway | www.pantherdb.org/pathway                                                                                                                                                                           |                                                                                                                                                                                                                                                                                                                                                                                                                                                                                                                                                                                                                                                                                                                                                                                                                                                                                                                                                                                                                                                                                                                                                                                                                                                                                                                                                                                                                             |
| PathArt         | jubilantbiosys.com/pd.htm                                                                                                                                                                           |                                                                                                                                                                                                                                                                                                                                                                                                                                                                                                                                                                                                                                                                                                                                                                                                                                                                                                                                                                                                                                                                                                                                                                                                                                                                                                                                                                                                                             |
| PathScout       | eminch.gmxhome.de/pathscout11                                                                                                                                                                       |                                                                                                                                                                                                                                                                                                                                                                                                                                                                                                                                                                                                                                                                                                                                                                                                                                                                                                                                                                                                                                                                                                                                                                                                                                                                                                                                                                                                                             |
| PathwayLab      | innetics.com                                                                                                                                                                                        | Not for free (-) but free trial * Excellent graphical representation * User definable graphics (multi-diagram formalism support, model close to textbook pictures if sufficiently well described in terms of actual functional dependencies) * Easy to enter equations, external (measured) signals, etc * Large on-line help and a set of example models * Fast ODE solver (CVODE) and just in time byte-code generation for high speed without the overhead of using a real C-compiler (although some loss of performance of course). * Quick preview plot functionality after simulation (mouse select object to see response) * Phase plane preview plot * Other analysis output in terms of text in report window of the application * Analysis tools: transient simulation, state computation, metabolic control analysis, parametric scanning * Export to SBML, Mathematica (+ application package with many utilities), and Matlab (both stand alone and suitable for SBtoolbox) SBtoolbox * Free download * No graphical representation (but well connected to graphical environment via PathwayLab) * Easy to enter equations defining the model via text based tailored GUI (special sections for state equations, auxiliary variables, parameters, etc) * Alternative reaction equation input form: $A+B \rightarrow C$ , $v_f = k \cdot A \cdot B$ * Good online Matlab help, ppt-tutorial material, brief web |

|                |                                                                                                                        |                                                                                                                                                                                                                                                                                                                                                                                                                                                                                                                                                                                                                                                                                             |
|----------------|------------------------------------------------------------------------------------------------------------------------|---------------------------------------------------------------------------------------------------------------------------------------------------------------------------------------------------------------------------------------------------------------------------------------------------------------------------------------------------------------------------------------------------------------------------------------------------------------------------------------------------------------------------------------------------------------------------------------------------------------------------------------------------------------------------------------------|
|                |                                                                                                                        | <p>descriptions * Matlab-speed which can be improved by using SBaddon (which compiles the code and links to CVODE for very fast simulations) * Representation of results in terms of plots and data in Matlab. Tailored plot window for quick selection of simulation results in terms of variable names. * Analysis tools: transient simulation, steady state computation, sensitivity analysis, "source of complex behavior" tools, parameter estimation (to some extent more to come) * Export/import to SBML</p> <p>For graphical representation mostly.</p>                                                                                                                            |
| Pathway Tools  | <a href="http://bioinformatics.ai.sri.com/ptools">bioinformatics.ai.sri.com/ptools</a>                                 |                                                                                                                                                                                                                                                                                                                                                                                                                                                                                                                                                                                                                                                                                             |
| PathwayBuilder | <a href="http://biospice.lbl.gov/PathwayBuilder">biospice.lbl.gov/PathwayBuilder</a>                                   | We use PathwayBuilder for schematic entry of reaction-based models. It is fairly easy to use and we know the designer, so we have gotten bug fixes and feature enhancements quickly.                                                                                                                                                                                                                                                                                                                                                                                                                                                                                                        |
| PATIKAweb      | <a href="http://www.patika.org">www.patika.org</a>                                                                     |                                                                                                                                                                                                                                                                                                                                                                                                                                                                                                                                                                                                                                                                                             |
| PaVESy         | <a href="http://pavesy.mpimp-golm.mpg.de/PaVESy.htm">pavesy.mpimp-golm.mpg.de/PaVESy.htm</a>                           |                                                                                                                                                                                                                                                                                                                                                                                                                                                                                                                                                                                                                                                                                             |
| PNK            | <a href="http://page.mi.fu-berlin.de/~trieglaf/PNK2e/index.html">page.mi.fu-berlin.de/~trieglaf/PNK2e/index.html</a>   |                                                                                                                                                                                                                                                                                                                                                                                                                                                                                                                                                                                                                                                                                             |
| Reactome       |                                                                                                                        |                                                                                                                                                                                                                                                                                                                                                                                                                                                                                                                                                                                                                                                                                             |
| Perl           |                                                                                                                        | Perl is a extremely useful tool for specific tasks because it is versatile and readily applicable to many tasks.                                                                                                                                                                                                                                                                                                                                                                                                                                                                                                                                                                            |
| PET*           | <a href="http://mpf.biol.vt.edu/software/homegr/own/pet">mpf.biol.vt.edu/software/homegr/own/pet</a>                   |                                                                                                                                                                                                                                                                                                                                                                                                                                                                                                                                                                                                                                                                                             |
| Powerpoint     | <a href="http://www.microsoft.com">www.microsoft.com</a>                                                               | <p>The advantage of Powerpoint is that the generated diagrams can be used for presentations and for publication purposes.</p> <p>Presentations + well integrated with PathwayLab (Visio).</p> <p>Now use Apple's Keynote.</p> <p>Perfect for purpose.</p> <p>Only for presentations.</p>                                                                                                                                                                                                                                                                                                                                                                                                    |
| ProcessDB      | <a href="http://www.integrativebioinformatics.com/processdb.html">www.integrativebioinformatics.com/processdb.html</a> |                                                                                                                                                                                                                                                                                                                                                                                                                                                                                                                                                                                                                                                                                             |
| PROTON         | dead link                                                                                                              |                                                                                                                                                                                                                                                                                                                                                                                                                                                                                                                                                                                                                                                                                             |
| pysbml         | <a href="http://www.basis.ncl.ac.uk/software.html">www.basis.ncl.ac.uk/software.html</a>                               |                                                                                                                                                                                                                                                                                                                                                                                                                                                                                                                                                                                                                                                                                             |
| PySCeS         | <a href="http://pysces.sourceforge.net">pysces.sourceforge.net</a>                                                     | <p>PySCeS is freely available, works in both Windows and Linux. Very stable program. Very elegant program: model definition is very easy. Program also gives some indication of syntax errors. Analysis tools are also very powerful and very easy to implement, and data may be saved easily. Program can be used for undergrad teaching as well as post-grad research.</p> <p>PySCeS is my primary modeling tool and has been developed as an extendible, free, open source modeling tool. To a large degree the advantages of using PySCeS are inherited from Python whereby one has full access to an object oriented, dynamically interpreted language as well as to optimized low</p> |

|                 |                                                                                                                    |                                                                                                                                                                                                                                                                                                                                                                             |
|-----------------|--------------------------------------------------------------------------------------------------------------------|-----------------------------------------------------------------------------------------------------------------------------------------------------------------------------------------------------------------------------------------------------------------------------------------------------------------------------------------------------------------------------|
|                 |                                                                                                                    | level Fortran and C numerical libraries (eg SciPy). This provides an acceptable (in my opinion) balance between flexibility and performance. However, admittedly, as a console based application PySCeS can be "confusing" for the novice modeler.                                                                                                                          |
| Python          | <a href="http://www.python.org">www.python.org</a>                                                                 | Nice language but not that fast.                                                                                                                                                                                                                                                                                                                                            |
| R               | <a href="http://www.r-project.org">www.r-project.org</a>                                                           | Good for plotting and analyzing results.<br><br>Ad-hoc statistical analysis.<br><br>Statistics.<br><br>My students used it.<br><br>BioConductor Packages, many tools and programs available for omics-Data analysis; availability without cost, also for students.<br><br>Free software and expert level routines.<br><br>Many implemented algorithms.<br><br>For plotting. |
| Reactome*       | <a href="http://www.reactome.org">www.reactome.org</a>                                                             |                                                                                                                                                                                                                                                                                                                                                                             |
| runSBML         | <a href="http://ariadnegenomics.com/technology/simulation.html">ariadnegenomics.com/technology/simulation.html</a> |                                                                                                                                                                                                                                                                                                                                                                             |
| SAAM II*        | <a href="http://depts.washington.edu/saam2">depts.washington.edu/saam2</a>                                         | The SAAM II software system is a general purpose modeling and simulation tool with a user-friendly interface based on compartmental models.                                                                                                                                                                                                                                 |
| SABIO-RK        | <a href="http://sabio.villa-bosch.de/SABIORK">sabio.villa-bosch.de/SABIORK</a>                                     |                                                                                                                                                                                                                                                                                                                                                                             |
| SBML ODE Solver | <a href="http://www.tbi.univie.ac.at/~raim/odeSolver">www.tbi.univie.ac.at/~raim/odeSolver</a>                     | SBML ODE Solver is very fast, free, open source (we can fix bugs) and can be reused for custom applications without compromising performance.<br><br>Building applications requiring fast simulation.                                                                                                                                                                       |
| SBMLEditor      | <a href="http://www.ebi.ac.uk/compneur-srv/SBMLEditor.html">www.ebi.ac.uk/compneur-srv/SBMLEditor.html</a>         | My latest version has not been stable enough.                                                                                                                                                                                                                                                                                                                               |
| SBMLmerge       | <a href="http://sysbio.molgen.mpg.de/sbmlmerge">sysbio.molgen.mpg.de/sbmlmerge</a>                                 | VERY nice tool, missing some important databases.                                                                                                                                                                                                                                                                                                                           |
| SBML-PET*       | <a href="http://sysbio.molgen.mpg.de/SBML-PET">sysbio.molgen.mpg.de/SBML-PET</a>                                   |                                                                                                                                                                                                                                                                                                                                                                             |
| SBMLR           | <a href="http://epbi-radivot.cwru.edu">epbi-radivot.cwru.edu</a>                                                   |                                                                                                                                                                                                                                                                                                                                                                             |
| SBMLSim         | <a href="http://www.dim.uchile.cl/~dremenik/SBMLSim">www.dim.uchile.cl/~dremenik/SBMLSim</a>                       |                                                                                                                                                                                                                                                                                                                                                                             |
| SBMLToolbox     | <a href="http://sbml.org/software/sbmltoolbox">sbml.org/software/sbmltoolbox</a>                                   | For mathematical modeling and analysis.                                                                                                                                                                                                                                                                                                                                     |
| SBliD           | <a href="http://www-timc.imag.fr/timb/SBliD">www-timc.imag.fr/timb/SBliD</a>                                       |                                                                                                                                                                                                                                                                                                                                                                             |
| SBToolbox       | <a href="http://www.sbtoolbox.org">www.sbtoolbox.org</a>                                                           | Provides various analysis tools and SBML import to MATLAB.                                                                                                                                                                                                                                                                                                                  |
| SBW             | <a href="http://sbw.kgi.edu">sbw.kgi.edu</a>                                                                       |                                                                                                                                                                                                                                                                                                                                                                             |
| SCIpath         | <a href="http://www.ucl.ac.uk/oncology/MicroCore/microcore.htm">www.ucl.ac.uk/oncology/MicroCore/microcore.htm</a> |                                                                                                                                                                                                                                                                                                                                                                             |
| Sigmoid         | <a href="http://sigmoid.sourceforge.net">sigmoid.sourceforge.net</a>                                               |                                                                                                                                                                                                                                                                                                                                                                             |
| SigPath         | <a href="http://www.sigpath.org">www.sigpath.org</a>                                                               | Useless.                                                                                                                                                                                                                                                                                                                                                                    |

|                    |                                                                                                                                                            |                                                                                                                                                                                                                                          |
|--------------------|------------------------------------------------------------------------------------------------------------------------------------------------------------|------------------------------------------------------------------------------------------------------------------------------------------------------------------------------------------------------------------------------------------|
| SigTran            | dead link                                                                                                                                                  |                                                                                                                                                                                                                                          |
| SIMBA              | <a href="http://www.ifak-system.com/swt/simulation/index.php?level=swtSIMBA4">www.ifak-system.com/swt/simulation/index.php?level=swtSIMBA4</a>             |                                                                                                                                                                                                                                          |
| SimBiology         | <a href="http://www.mathworks.com/products/simbiology">www.mathworks.com/products/simbiology</a>                                                           |                                                                                                                                                                                                                                          |
| Simpathica         | <a href="http://bioinformatics.nyu.edu/Projects/Simpathica">bioinformatics.nyu.edu/Projects/Simpathica</a>                                                 |                                                                                                                                                                                                                                          |
| SimWiz             | <a href="http://projects.villa-bosch.de/bcb/software/software/Ulla/SimWiz">projects.villa-bosch.de/bcb/software/software/Ulla/SimWiz</a>                   |                                                                                                                                                                                                                                          |
| SloppyCell*        | <a href="http://sloppycell.sourceforge.net">sloppycell.sourceforge.net</a>                                                                                 |                                                                                                                                                                                                                                          |
| SmartCell          | <a href="http://smartcell.embl.de">smartcell.embl.de</a>                                                                                                   |                                                                                                                                                                                                                                          |
| Snoopy*            | <a href="http://www-dssz.informatik.tu-cottbus.de/index.html?/software/snoopy.html">www-dssz.informatik.tu-cottbus.de/index.html?/software/snoopy.html</a> | Snoopy is a software tool to design and animate hierarchical graphs, among others Petri nets.                                                                                                                                            |
| SRS Pathway Editor | <a href="http://www.biowisdom.com/solutions/srs">www.biowisdom.com/solutions/srs</a>                                                                       |                                                                                                                                                                                                                                          |
| STELLA*            | <a href="http://www.iseesystems.com/software/Education/StellaSoftware.aspx">www.iseesystems.com/software/Education/StellaSoftware.aspx</a>                 | STELLA is a flexible computer modeling package with an easy, intuitive interface that allows users to construct dynamic models that realistically simulate biological systems.                                                           |
| StochSim           | <a href="http://www.pdn.cam.ac.uk/groups/com-p-cell/StochSim.html">www.pdn.cam.ac.uk/groups/com-p-cell/StochSim.html</a>                                   |                                                                                                                                                                                                                                          |
| StochKit*          | <a href="http://www.engineering.ucsb.edu/~cse/StochKit">www.engineering.ucsb.edu/~cse/StochKit</a>                                                         |                                                                                                                                                                                                                                          |
| STOCKS             | <a href="http://www.sysbio.pl/stocks">www.sysbio.pl/stocks</a>                                                                                             |                                                                                                                                                                                                                                          |
| TERANODE Suite     | <a href="http://teranode.com/products">teranode.com/products</a>                                                                                           | Ease of use, inputting graphs and equations.                                                                                                                                                                                             |
| Trelis             | <a href="http://sourceforge.net/projects/trelis">sourceforge.net/projects/trelis</a>                                                                       |                                                                                                                                                                                                                                          |
| Virtual Cell       | <a href="http://www.vcell.org">www.vcell.org</a>                                                                                                           |                                                                                                                                                                                                                                          |
| Visio              | <a href="http://www.microsoft.com">www.microsoft.com</a>                                                                                                   |                                                                                                                                                                                                                                          |
| WebCell*           | <a href="http://webcell.kaist.ac.kr">webcell.kaist.ac.kr</a>                                                                                               |                                                                                                                                                                                                                                          |
| WinSCAMP           | <a href="http://sbw.kgi.edu">sbw.kgi.edu</a>                                                                                                               |                                                                                                                                                                                                                                          |
| XPPAUT             | <a href="http://www.math.pitt.edu/~bard/xpp/xpp.html">www.math.pitt.edu/~bard/xpp/xpp.html</a>                                                             | Free and easy to use, bifurcation analysis interface.<br><br>Bifurcation analysis.<br><br>Used via SBtoolbox interface.                                                                                                                  |
| yEd*               | <a href="http://www.yworks.com/en/products_yed_about.htm">www.yworks.com/en/products_yed_about.htm</a>                                                     | yEd is a very powerful graph editor that is written entirely in the Java programming language. It can be used to quickly and effectively generate drawings and to apply automatic layouts to a range of different diagrams and networks. |
